# Supplementary material for: ESR1 Amplification in Breast Cancer by Optimized RNase FISH: Frequent but Low-Level and Heterogeneous
Source: PLoS One. 2013 Dec 18;8(12):e84189. doi: 10.1371/journal.pone.0084189 (PMC3867473; doi:10.1371/journal.pone.0084189)
Supplement: Table S2 — FISH results without and with RNase treatment, performed on a breast TMA. (XLSX) [file pone.0084189.s004.xlsx]

## Sheet: TMA RNAse suppl table 2
	no RNAse				RNAse
Localisation	ESR1 status	ratio	ESR1 range	CEP6 range	ESR1	ratio	ESR1 range	CEP6 range	Year	Subtype	age	max TD	Grading	Stage	pN	lymph nodes pos	lymph nodes all	ER	PR	HER-2
1a	no amp		2	2	no amp		2	2	2009		80	7,5	3	pT4b	pN2a	7	9	2	0	0
1b	gain	1.82857	2-5	2	gain	1.59375	2-3	2	2009	ductal	82	4.8	2	pT4b	pN2	8	14	8	8	0
1c	gain	1.90141	2-5	2	gain	1.60345	-	-	2009	lobular	72	7	3	pT3	pN3a	14	20	12	6	0
1d	no amp		2	2	no amp		2	2	2009	ductal	63	6	3	pT3	pN3a	10	21	12	12	0
1e	-		-	-	-		-	-	2009	ductal	56	1.9	2	pT1c	pN2a	9	24	12	0	0
1f	-		-	-	-		-	-	2008	ductal	59	2.9	3	pT2	pN2a	6	24	12	6	3
1g	-		-	-	-		-	-	2008	ductal	49	0.5	2	pT2	pN2a	9	10	8	4	0
1h	no amp		2	2	no amp		2	2	2008	ductal	83	6.8	2	pT4b	pN3a	16	20	12	0	0
1i	-		-	-	-		-	-	2008	lobular	83	7	2	pT3	pN3a	17	19	8	4	0
1k	no amp		2	2	no amp		2	2	2001	ductal	49	2.5	3	pT4	pN2	28	30	2	4	0
1l	-		-	-	-		-	-	2009	lobular	48	8	2	pT3	pN3a	10	23	12	12	0
1m	no amp		2	2	no amp		2	2	2008	ductal	67	1.8	2	pT1c	pN2a	4	14	6	6	0
1n	gain	1.84848	2-6	2	gain	1.51852	2-4	2	2005	ductal	61	3	2	pT2	pN2a	7	25	9	3	0
1o	gain	1.88889	2-5	2	gain	1.86957	2-5	2	2003	invasive with DCIS	47	5,5	3	pT3		10	14	3	6	0
1p	no amp		2	2	no amp		2	2	2003	tubular, lobular	37	5	2	pT2	pN2a	5	24	4	9	1
1q	gain	1.71875	2-6	2	gain	1.7037	2-5	2	2009	ductal	71	4		pT4b	pN2a	8	21	12	8	0
2a	no amp		2	2	no amp		2	2	2006	ductal	83	4	2	pT4b	pN1a	2	9	8	8	0
2b	no amp		2	2	no amp		2	2	2008	ductal	52	3.7	3	pT2	pN1a	3	20	8	2	0
2c	no amp		2	2	no amp		2	2	2008	ductal	59	1.9	1	pT1c	pN2a	4	10	8	0	0
2d	-		-	-	-		-	-	2007	ductal	72	3.4	2	pT2	pN2a	7	8	0	0	0
2e	-		-	-	-		-	-	2006	lobular	55	4	2	pT2	pN1a	2	17	9	3	0
2f	-		-	-	-		-	-	2002		48	4,5	3	pT2		11	24	9	9	0
2g	no amp		2	2	no amp		2	2	2008	ductal	78	1.6	1	pT2	pN1a	3	24	12	12	0
2h	no amp		2	2	no amp		2	2	2008	ductal	50	2.5	2	pT2	pN1a	2	12	8	12	0
2i	no amp		1-2	2	no amp		1-2	2	2006	lobular	81	3.5	3	pT4b	pN1a	1	7	9	6	0
2k	gain	1.34694	2-5	2	gain	1.33333	2-5	2	2009	ductal	32	3.7	3	pT4b	pN1a	1	18	12	2	0
2l	-		-	-	-		-	-	2009	ductal	64	7.5	2	pT4b	pN2a	9	11			0
2m	-		-	-	-		-	-	2008	ductal	49	1.8	2	pT1c	pN1a	1	10	8	12	0
2n	no amp		2	2	no amp		2	2	2008	lobular	56	2.8	3	pT2	pN1a	2	14	12	6	3
2o	no amp		2	2	no amp		2	2	2007	ductal	65	5	3	pT4b	pN3a	13	14	9	3	0
2p	no amp		2	2	no amp		2	2	2005	ductal	36	2.2	2	pT2	pN1a	1	12	6	6	0
2q	amp	2.5	3-12	2	amp	2.47222	3-7	2	2008	ductal	63	3.3	2	pT2	pN1a	1	22	12	0	0
3a	no amp		2	2	no amp		2	2	2005	ductal	65	5.7	3	pT3	pN1a	3	20	12	12	1
3b	no amp		2	2	no amp		2	2	2009	ductal	58	0.6	2	pT3	pN1a	1	12	12	12	0
3c	gain	1.45946	2-4	2	no amp	1.21951	2-4	2	2008	lobular	76	4.5	2	pT2	pN1a	2	20	12	8	0
3d	no amp		2	2	no amp		2	2	2009	lobular	60	7.5			pN1a	2	7	8	4
3e	no amp		2	2	no amp		2	2	2009	ductal	52	2.3	1	pT2	pN0	0	3	12	12	0
3f	no amp		2	2	no amp		2	2	2009	mucinous	37	3.4	2	pT2	pN1a	2	12	6	6	0
3g	-		-	-	-		-	-	2009	lobular	64	2.4	2	pT2		0	0	12	12	0
3h	-		-	-	-		-	-	2009	ductal	55	1.2	2	pT1c	pN0	0	3	12	12	0
3i	gain	1.77419	2-3	2	gain	1.44444	-	-	2009	ductal	64	2.3	2	pT2	pN1a	1	12	12	12	0
3k	no amp		2	2	no amp		2	2	2009	ductal	47	2.5	2	pT2	pNX	0	0	12	12	0
3l	gain	1.37143	2-5	2	no amp	1.14634	-	-	2009	ductal	46	3.2	2	pT2	pN0	0	6	12	12	0
3m	-		-	-	-		-	-	2009	ductal	55	2.5	3	pT2	pN1	1	18	0	0	0
3n	no amp		2	2	no amp		2	2	2009	ductal	38	3.8	3	pT2	pN0	0	1
3o	-		-	-	-		-	-	2009	lobular	56	1.6	2	pT1c	pN0	0	6	12	12	0
3p	gain	1.31325	2-3	2	gain	1.35897	2-3	2	2009	lobular	64	3.8	2	pT2	pN0	0	3	12	12	0
3q	no amp		2	2	no amp		2	2	2009	ductal	56	3.6	3	pT2	pN1	1	1	0	0	0
4a	gain	1.66667	2-3	2	amp	2.09375	2-4	2	2008	ductal	63	2.1	2	pT2	pN0	0	4	12	6	0
4b	-		-	-	-		-	-	2008	lobular	62	3.6	3	pT2	pN0	0	4	12	12	0
4c	-		-	-	-		-	-	2008	ductal	68	2.6	2	pT2	pN1a	1	25	12	12	0
4d	no amp		2	2	no amp		2	2	2008	ductal	42	2.1	1	pT2	pN1	1	14	2	6	0
4e	amp	3.07895	3-9	2	amp	4.15909	3-9	2	2008	ductal	62	3.2	3	pT2	pN0	0	12	12	6	0
4f	gain	1.85	4	2	gain	1.78788	-	-	2008	lobular	63	1.8	2	pT1c	pN1	1	3	12	3	0
4g	amp	2.82143	3-5	2	amp	2.09091	3-5	2	2008	trabecular	78	1.8	2	pT1c	pN0	0	3	12	9	0
4h	gain	1.72727	2-6	2	gain	1.59375	2-5	2	2008	ductal	79	3.8	3	pT2	pN0	0	2 (Sentinel)	12	0	3
4i	amp	2.03226	3-5	2	gain	1.75758	2-4	2	2008	ductal	57	2.1	2	pT2	pN2a	6	16	12	12	0
4k	-		-	-	-		-	-	2008	ductal	53	1.2	3	pT1c	pN0	0	3	9	9	3
4l	-		-	-	-		-	-	2008	lobular	63	2.9	2	pT2	pN1a	2	6 (Sentinel)	12	6	0
4m	-		-	-	-		-	-	2008	ductal	87	3.3	2	pT4b	pN1a	2	12	8	4	0
4n	-		-	-	-		-	-	2007	lobular	63	2	1	pT1c	pN0	0	19	8	8	0
4o	gain	1.47368	2-5	2	amp	2.14815	2-5	2	2007	ductal	79	2.4	3	pT2	pN0	0	1	12	9	0
4p	no amp		2	2	no amp		2	2	2007	ductal	78	2.8	2	pT2	pN3a	14	22	8	4	0
4q	no amp		2-4	2-4	no amp		2-4	2-4	2006	ductal	75	2.7	3	pT2	pN0	0	4 (Sentinel)	9	9	0
5a	gain	1.68293	3-6	2	gain	1.70588	2-5	2	2006	ductal	87	4.4	3	pT2				8	4	3
5b	-		-	-	-		-	-	2006	lobular	67	2.9	2	pT2	pN0	0	11	4	4	0
5c	gain	1.70968	2-3	2	gain	1.9375	2-3	2	2006	ductal	58	3.2	2	pT2	pN0	0	10	12	9	0
5d	gain	1.6875	2-3	2	gain	1.44444	2-3	2	2009	ductal	44	1,2	1	pT1c	pN0	0	4
5e	-		-	-	-		-	-	2009	ductal	47	2.2	2	pT2	pN0	0	3 (Sentinel)	12	6	3
5f	-		-	-	-		-	-	2009	ductal	71	1.7	3	pT1c	pN0	0	2 (Sentinel)	8	0	0
5g	amp	2.92593	3-7	2	amp	2.13514	2-6	2	2009	papillary	61	1.8	1	pT1c	pN0	0	1	8	9	0
5h	no amp		2	2	no amp		2	2	2009	ductal	29	2	3	pT1c	pN0	0	2	8	0	0
5i	no amp		2	2	no amp		2	2	2008	ductal	51	2.2	2	pT2	pN1a	2	22	4	12	3
5k	-		-	-	-		-	-	2008	lobular	52	3.5	2	pT2	pN0	0	1			0
5l	amp	2.27907	3-5	2	amp	2.16279	2-6	2	2008	lobular	70	1.6	2	pT1c	pN0	0	1 (Sentinel)	8	1	3
5m	no amp		2	2	no amp		2	2	2008	ductal	58	4.2	2	pT2	pN0	0	3 (Sentinel)	12	12?	0
5n	-		-	-	-		-	-	2008	ductal	61	0.5	1	pT1b	pN0	0	2	0	8	0
5o	gain	1.68182	3-6	2	gain	1.86667	2-6	2	2008	ductal	58	4.8	3	pT2	pN0	0	3	12	0	0
5p	-		-	-	-		-	-	2007	ductal	50	2	2	pT1c	pN0	0	3 (Sentinel)	4	9	0
5q	amp	2.32609	3-6	2	amp	3.82759	2-5	2	2007	ductal	73	2.5	1	pT1c	pN0	0	5	8	8	0
6a	no amp		1-2	1-2	no amp		1-2	1-2	2006	ductal	85	2	2	pT1c				9	9	0
6b	gain	1.78947	2-6	2	gain	1.65854	-	-	2009	ductal, micropapillary	67	2	2	pT1c	pN1a	1	17	8	12	0
6c	-		-	-	-		-	-	2009	lobular	68	1.8	2	pT1c	pN0	0	5 (Sentinel)	12	12	0
6d	no amp		2	2	no amp		2	2	2008	ductal	85	0.91	2	pT3	pN1a	2	4	12	0	0
6e	no amp		2	2	no amp		2	2	2008	lobular	70	2.3	2	pT2	pN0	0	2 (Sentinel)	8	6	0
6f	-		-	-	-		-	-	2008	ductal	2.3	2.3	2	pT2	pN1a	2	22	12	12	0
6g	gain	1.6	2-3	2	amp	2.33333	-	-	2008	ductal	73	4.5	3	pT2	pN0	0	1 (Sentinel)	12	0	0
6h	amp	2.0303	2-8	2	amp	2.88571	2-8	2	2007	ductal	71	5.5	3	pT4b	pN1a	3	22	12	1	3
6i	-		-	-	-		-	-	2006	lobular	70	15	2	pT4b		0	0	6	0	0
6k	-		-	-	-		-	-	2006	ductal	44	1.6	2	pT1c				8	8	0
6l	-		-	-	-		-	-	2006	lobular	86	5.5	2	pT4b				9	0	0
6m	-		-	-	-		-	-	2006	ductal	67	2.1	3	pT2				12	9	0
6n	no amp		2	2	no amp		2	2	2006		71	2.8	3	pT2	pN0	0	14	0	0	3
6o	-		-	-	-		-	-	2005		53	3.5	3	pT2	pN0	0	23	6	4	0
6p	-		-	-	-		-	-	2009	ductal	64	3.5	3	pT2	pN3a	11	26	1	0	0
6q	-		-	-	-		-	-	2009	ductal	65	1.4	2	pT1c	pN0	0	2	12	12	0
7a	-		-	-	-		-	-	2009	ductal	89	2.2	3	pT1	pN0	0	13	12	4	0
7b	-		-	-	-		-	-	2009	ductal	57	1,4	1	pT1c	pN0	0	2 (Sentinel)	12	9	0
7c	no amp		2	2	no amp		2	2	2009	ductal	66	2.5	3	pT2	pN1a	2	37	12	0	3
7d	-		-	-	-		-	-	2008	ductal	60	2.7	1	pT2	pN0	0	2	4	6	0
7e	-		-	-	-		-	-	2008	lobular	71	2	1	pT1	pN0			12	9	0
7f	-		-	-	-		-	-	2008	lobular	71	1.6	2	pT1c	pN1a	1	1	8	0	0
7g	-		-	-	-		-	-	2008	tubular	75	1	1	pT1b	pN0	0	2	12	12	0
7h	no amp		2	2	no amp		2	2	2008	lobular	76	4	2	pT2	pN0	0	1 (Sentinel)	4	0	0
7i	-		-	-	-		-	-	2008	lobular	69	3	2	pT2	pN0	0	1 (Sentinel)	8	12	0
7k	-		-	-	-		-	-	2007	ductal	39	3	2	pT2	pN0	0	3	4	9	0
7l	-		-	-	-		-	-	2007	ductal	35	4.2	2	pT2	pN0	0	11	4	0	0
7m	amp	2.02632	3-9	2	amp	2.69048	3-7	2	2005	ductal	61	2.7	3	pT2	pN0	0	13	12	0	0
7n	-		-	-	-		-	-	2003	ductal	47	3	2	pT2				12	12	2
7o	no amp		2	2	no amp		2	2	2002	ductal	35	1,5	3	pT1c		0	20
7p	no amp		2	2	no amp		2	2	2009	ductal	71	3	3	pT2	pNX	0	2	0	0	3
7q	-		-	-	-		-	-	2009
8a	-		-	-	-		-	-	2009	ductal	49	2.3	1	pT2	pN0	0	9	8	12	0
8b	no amp		2	2	no amp		2	2	2009	ductal	58	2.2	3	pT2	pN0	0	2	0	0	0
8c	no amp		2	2	no amp		2	2	2009	ductal	58	1.3	1	pT1c	pN0	0	4	12	0	0
8d	no amp		1-2	2-3	no amp		1-2	2-3	2009	lobular	68	1.3	2	pT1c	pN0	0	2 (Sentinel)	6	1	0
8e	-		-	-	-		-	-	2009	ductal	53	1.5	3	pT1c	pN0	0	2 (Sentinel)	0	0	0
8f	no amp		2	2	no amp		2	2	2009	ductal	70	1,5	2	pT1c	pN1	2	2 (Sentinel)	12	8	0
8g	-		-	-	-		-	-	2009	ductal	83	3.2	1	pT2		0	28	8	12	0
8h	-		-	-	-		-	-	2008	ductal	74	3.5	2	pT2	pN0	0	1 (Sentinel)	0	0	0
8i	gain	1.31429	3-5	2	gain	1.67857	2-4	2	2008	ductal	49	1.8	2	pT1c	pN0	0	2 (Sentinel)	8	0	0
8k	-		-	-	-		-	-	2008	ductal	67	2.5	2	pT2	pN0	0	1 (Sentinel)	12	12	0
8l	-		-	-	-		-	-	2008	lobular	47	0.8	2	pT1b	pN0	0	5	4	12	0
8m	-		-	-	-		-	-	2008	lobular	88	1.7	2	pT1c	pN0	0	2	8	0	0
8n	-		-	-	-		-	-	2008	ductal	78	1.6	1	pT1c	pN1a	1	14	6	0	0
8o	-		-	-	-		-	-	2008	tubular	64	1.2		pT1c	pN0	0	1 (Sentinel)	0	0	0
8p	-		-	-	-		-	-	2008	papillary	71	1	2	pT1b	pN0	0	4 (Sentinel)	12	0	0
8q	no amp		2	2	no amp		2	2	2008	ductal	49	1.5	1	pT1c	pNX	0	0	12	0	0
9a	no amp		2	2	no amp		2	2	2008	ductal	48	1.7	3	pT1c	pN0	0	2 (Sentinel)	0	0	3
9b	no amp		2	2	no amp		2	2	2008	ductal	31	3.5	2	pT2	pN2a	8	20	0	0	0
9c	-		-	-	-		-	-	2008	ductal	66	2.5	1	pT2	pN1	1	18	4	9	0
9d	no amp		2	2	no amp		2	2	2007	ductal, lobular	78	2.1	1	pT2	pN0	0	1	8	1	0
9e	no amp		2	2	no amp		2	2	2007	ductal	66	1.7	2	pT1c	pNX	0	0	12	2	0
9f	no amp		2	2	no amp		2	2	2007	ductal	73	2.3	2	pT2	pN0	0	15	9	12	0
9g	-		-	-	-		-	-	2006	ductal	53	1.3	2	pT1c		0	0	9	2	0
9h	-		-	-	-		-	-	2006	ductal	68	2.5	2	pT2	pN0	0	17	9	12	0
9i	-		-	-	-		-	-	2006	ductal	33	1,4	3	pT1c	pN0	0	2	0	4	0
9k	-		-	-	-		-	-	2005	lobular	50	2.1	2	pT2	pN1a	1	20	2	2	0
9l	-		-	-	-		-	-	2005	ductal, lobular	63	2.5	2	pT2	pN0	0	12	12	9	3
9m	amp	2.11538	3-5	2	amp	2.6	3-5	2	2005	ductal	52	3.5	2	pT2	pN0	0	12	8	2	3
9n	amp	2.14706	4-10	2	amp	3.7	4-7	2	2003	ductal	48	3.7	3	pT2	pN0	0	23	6	4	2
9o	no amp		2	2	no amp		2	2	2003	tubular, lobular	54	2.2	2	pT2	pN1	1	4	9	6	1
9p	-		-	-	-		-	-	2003	lobular	82	6,6	2	pT4	pN0	0	17	0	0	0
9q	-		-	-	-		-	-	2002	lobular	54	1,1	2	pT1c		0	15	3	3	2
10a	-		-	-	-		-	-	2001	ductal	36	>5	2	pT3	pN1	5	19	3	0	3
10b	no amp		2	2	no amp		2	2	2001	lobular	51	3	2	pT2		0	26	12	2	1
10c	no amp		2	2	no amp		2	2	2001	lobular	87	2.7	2	pT2		0	6	12	2	0
